# Supplementary material
Source: PubMed Central journal article supplement (PMC9783958)
Supplement: bcd-20-0216_supplementary_table_1_suppst1.pdf [file bcd-20-0216_supplementary_table_1_suppst1.pdf]

**Supplementary Table 1**

| Patient | Sample Type | Subtype    | Age | Sex | BM Blast Count | WBC Count (mm <sup>3</sup> ) | CNS Disease At Diagnosis | Cytogenetics                                                                               | Initial Therapy Protocol | Time to Relapse (months) | Type of relapse     | Status   | Waanders et al. Patient |
|---------|-------------|------------|-----|-----|----------------|------------------------------|--------------------------|--------------------------------------------------------------------------------------------|--------------------------|--------------------------|---------------------|----------|-------------------------|
| 1       | Diagnostic  | DUX4       | >18 | M   | 90%            | 78                           | negative                 | 46,XY, del(6)(q21q23), t(11;13)(p11.2; q12)                                                | Dana Farber              | 9                        | hematologic         | deceased | SJBALL 022609           |
| 1       | Relapse1    | B-Other    |     |     | nd             | 82                           | n/a                      | nd                                                                                         |                          |                          |                     |          |                         |
| 3       | Relapse1    | DUX4       | >18 | M   | 90%            | 1.9                          | negative                 | nd                                                                                         | Dana Farber              | 15.37                    | hematologic         | deceased | SJBALL 022611           |
| 4       | Diagnostic  | B-Other    | >18 | M   | 90%            | 10.5                         | positive                 | not assessable                                                                             | Dana Farber              | 6.3                      | hematologic         | deceased | SJBALL 022612           |
| 4       | Relapse1    |            |     |     | 90%            | 3.8                          | n/a                      | nd                                                                                         |                          |                          |                     |          |                         |
| 6       | Relapse1    | B-Other    | >18 | M   | 90%            | 7.1                          | negative                 | 46 XY t(2;3)(p23,q21)[9] 46 XY [11]                                                        | Dana Farber              | 33.97                    | hematologic         | deceased | SJBALL 022614           |
| 7       | Diagnostic  | DUX4       | <18 | F   | 92%            | 52.1                         | negative                 | 46, XX, del(9)(p22)[20/100%]                                                               |                          | 39.6                     | hematologic         | deceased | SJERG 009               |
| 7       | Relapse1    |            |     |     | 78%            | nd                           | n/a                      | 46,XX [8/63%]/46,XX, del(9)(p22) [3/27%]                                                   |                          |                          |                     |          |                         |
| 9       | Diagnostic  | B-Other    | <18 | M   | 96%            | 15.5                         | negative                 | 46,XY [1/5%]/47,XY, del(9)(p13),+18 [19/95%]                                               | Total XV                 | 48.12                    | hematologic and CNS | alive    | SJBALL 036              |
| 9       | Relapse1    |            |     |     | 76%            | nd                           | n/a                      | 46,XY [7/35%]/47,XY, del(9)(p13),+18 [13/65%]                                              |                          |                          |                     |          |                         |
| 10      | Relapse1    | B-Other    | <18 | F   | 84%            | nd                           | negative                 | 46,XX[3/15%]/46,X,t(X;2)(p11.4;p11.2)[17/85%]                                              | Total XIII               | 94.8                     | hematologic         | deceased | SJBALL 031              |
| 11      | Diagnostic  | KMT2A-AFF1 | <18 | M   | 100%           | 455                          | negative                 | 46,XY [5/21%]/46,XY,t(4;11)(q21;q23)[9/37%]/47,XY,+X,t(4;11)(q21;q23)[10/42%]              | Total Xiii               | 14.64                    | hematologic         | deceased | SJMLL 039               |
| 11      | Relapse1    |            |     |     | 78%            |                              | n/a                      | 46,XY [16/64%]/45,idem,dic(17;18)(q10;q10) [2/8%]/46,XY,t(4;11)(q21;q23),i(7)(q10) [7/28%] |                          |                          |                     |          |                         |
| 12      | Diagnostic  | KMT2A-AFF1 | <18 | F   | 98%            | 299                          | negative                 | 46,XX,t(4;11)(q21;q23)[22/100%]                                                            | Total XIII               | 5.88                     | hematologic         | deceased | SJMLL 026               |
| 12      | Relapse1    |            |     |     | 96%            |                              | n/a                      | 46,XX [1/8%]/46,XX,t(4;11)(q21;q23) [11/92%]                                               |                          |                          |                     |          |                         |
| 13      | Diagnostic  | ETV6-RUNX1 | <18 | F   | 98%            | 25.5                         | negative                 | 45,X,-X [20/100%]/.nuc ish 12p13(TEL x2),2q22 (AML1 x 2)(TEL con AML1 x 1)                 | Total XV                 | 7.80                     | hematologic         | deceased | SJETV 010               |
| 13      | Relapse1    |            |     |     | nd             |                              | n/a                      | nd                                                                                         |                          |                          |                     |          |                         |
| 15      | Diagnostic  | KMT2A-AFF1 | >18 | F   | 96%            | 269                          | negative                 | 46,XX,t(4;11)(q21;q23)[6]                                                                  | Dana Farber              | n/a - CR not achieved    | n/a                 | deceased | n/a                     |

Supplementary Table 1. Clinical Characteristics of B-ALL Patient Samples. Patient number, sample type (diagnosis / relapse status and relapse number), molecular subgroup, pediatric / adult category, sex, blast and white blood cell count (WBC), CNS stats where negative = CNS1 and n/a reflects data not available, propensity to generate CNS disease in xenografts on scale of -, +, ++, +++ from least to greatest, cytogenetics by fluorescence in situ hybridization, first line therapy, time to relapse (CR = complete response), type of relapse (hematologic versus CNS), vital status (alive or deceased).
