# Supplementary material
Source: PubMed Central journal article supplement (PMC9783958)
Supplement: bcd-20-0216_supplementary_table_2_suppst2.pdf [file bcd-20-0216_supplementary_table_2_suppst2.pdf]

**Supplementary Table 2**

| <u>Patient</u> | <u>Diagnosis<br/>or<br/>Relapse<br/>Sample</u> | <u>Primary<br/>Xenograft</u> | <u>Tissue</u> | <u>Targeted<br/>Sequencing</u> | <u>RNA<br/>Sequencing</u> | <u>Secondary<br/>Engraftment<br/>Experiments</u> | <u>Tertiary<br/>Engraftment<br/>Experiments</u> | <u>Proteomics</u> |
|----------------|------------------------------------------------|------------------------------|---------------|--------------------------------|---------------------------|--------------------------------------------------|-------------------------------------------------|-------------------|
| Patient 1      | Diagnosis                                      | dxeno 1                      | BM            | yes                            |                           |                                                  |                                                 |                   |
| Patient 1      | Diagnosis                                      | dxeno 1                      | CNS           | yes                            |                           |                                                  |                                                 |                   |
| Patient 1      | Diagnosis                                      | dxeno 2                      | BM            | yes                            |                           |                                                  |                                                 |                   |
| Patient 1      | Diagnosis                                      | dxeno 2                      | CNS           | yes                            |                           |                                                  |                                                 |                   |
| Patient 1      | Diagnosis                                      | dxeno 8                      | BM            | yes                            |                           |                                                  |                                                 |                   |
| Patient 1      | Diagnosis                                      | dxeno 8                      | CNS           | yes                            |                           |                                                  |                                                 |                   |
| Patient 1      | Diagnosis                                      | dxeno 11                     | BM            | yes                            |                           |                                                  |                                                 |                   |
| Patient 1      | Diagnosis                                      | dxeno 11                     | CNS           | yes                            |                           |                                                  |                                                 |                   |
| Patient 1      | Diagnosis                                      | dxeno 12                     | BM            | yes                            |                           |                                                  |                                                 |                   |
| Patient 1      | Diagnosis                                      | dxeno 12                     | CNS           | yes                            |                           |                                                  |                                                 |                   |
| Patient 1      | Diagnosis                                      | dxeno 13                     | BM            | yes                            |                           |                                                  |                                                 |                   |
| Patient 1      | Diagnosis                                      | dxeno 13                     | CNS           | yes                            |                           |                                                  |                                                 |                   |
| Patient 1      | Relapse                                        | rxeno 8                      | BM            | yes                            |                           |                                                  |                                                 |                   |
| Patient 1      | Relapse                                        | rxeno 8                      | CNS           | yes                            |                           |                                                  |                                                 |                   |
| Patient 1      | Relapse                                        | rxeno 11                     | BM            | yes                            |                           |                                                  |                                                 |                   |
| Patient 1      | Relapse                                        | rxeno 11                     | CNS           | yes                            |                           |                                                  |                                                 |                   |
| Patient 1      | Relapse                                        | rxeno 12                     | BM            | yes                            |                           |                                                  |                                                 |                   |
| Patient 1      | Relapse                                        | rxeno 12                     | CNS           | yes                            |                           |                                                  |                                                 |                   |
| Patient 1      | Relapse                                        | rxeno 15                     | BM            | yes                            |                           |                                                  |                                                 |                   |
| Patient 1      | Relapse                                        | rxeno 15                     | CNS           | yes                            |                           |                                                  |                                                 |                   |
| Patient 1      | Relapse                                        | rxeno 16                     | BM            | yes                            |                           |                                                  |                                                 |                   |
| Patient 1      | Relapse                                        | rxeno 16                     | CNS           | yes                            |                           |                                                  |                                                 |                   |
| Patient 1      | Relapse                                        | rxeno 18                     | BM            | yes                            |                           |                                                  |                                                 |                   |
| Patient 1      | Relapse                                        | rxeno 18                     | CNS           | yes                            |                           |                                                  |                                                 |                   |
| Patient 1      | Relapse                                        | rxeno 20                     | BM            | yes                            |                           |                                                  |                                                 |                   |
| Patient 1      | Relapse                                        | rxeno 20                     | CNS           | yes                            |                           |                                                  |                                                 |                   |
| Patient 3      | Relapse                                        | rxeno 2                      | BM            | yes                            |                           |                                                  |                                                 |                   |
| Patient 3      | Relapse                                        | rxeno 2                      | CNS           | yes                            |                           |                                                  |                                                 |                   |
| Patient 3      | Relapse                                        | rxeno 4                      | BM            | yes                            |                           |                                                  |                                                 |                   |
| Patient 3      | Relapse                                        | rxeno 4                      | CNS           | yes                            |                           |                                                  |                                                 |                   |
| Patient 3      | Relapse                                        | rxeno 5                      | BM            | yes                            |                           |                                                  |                                                 |                   |
| Patient 3      | Relapse                                        | rxeno 5                      | CNS           | yes                            |                           |                                                  |                                                 |                   |
| Patient 3      | Relapse                                        | rxeno 7                      | BM            | yes                            |                           |                                                  |                                                 |                   |
| Patient 3      | Relapse                                        | rxeno 7                      | CNS           | yes                            |                           |                                                  |                                                 |                   |
| Patient 3      | Relapse                                        | rxeno 10                     | BM            | yes                            |                           |                                                  |                                                 |                   |
| Patient 3      | Relapse                                        | rxeno 10                     | CNS           | yes                            |                           |                                                  |                                                 |                   |
| Patient 4      | Diagnosis                                      | dxeno 2                      | BM            | yes                            |                           |                                                  |                                                 |                   |
| Patient 4      | Diagnosis                                      | dxeno 2                      | CNS           | yes                            |                           |                                                  |                                                 |                   |
| Patient 4      | Diagnosis                                      | dxeno 3                      | BM            | yes                            |                           |                                                  |                                                 |                   |
| Patient 4      | Diagnosis                                      | dxeno 3                      | CNS           | yes                            |                           |                                                  |                                                 |                   |
| Patient 4      | Relapse                                        | rxeno 2                      | BM            | yes                            |                           |                                                  |                                                 |                   |
| Patient 4      | Relapse                                        | rxeno 2                      | CNS           | yes                            |                           |                                                  |                                                 |                   |
| Patient 4      | Relapse                                        | rxeno 3                      | BM            | yes                            |                           |                                                  |                                                 |                   |
| Patient 4      | Relapse                                        | rxeno 3                      | CNS           | yes                            |                           |                                                  |                                                 |                   |
| Patient 4      | Relapse                                        | rxeno 4                      | BM            | yes                            |                           |                                                  |                                                 |                   |
| Patient 4      | Relapse                                        | rxeno 4                      | CNS           | yes                            |                           |                                                  |                                                 |                   |
| Patient 4      | Relapse                                        | rxeno 5                      | BM            | yes                            |                           |                                                  |                                                 |                   |
| Patient 4      | Relapse                                        | rxeno 5                      | CNS           | yes                            |                           |                                                  |                                                 |                   |
| Patient 4      | Relapse                                        | rxeno 7                      | BM            | yes                            |                           |                                                  |                                                 |                   |
| Patient 4      | Relapse                                        | rxeno 7                      | CNS           | yes                            |                           |                                                  |                                                 |                   |
| Patient 4      | Relapse                                        | rxeno 8                      | BM            | yes                            |                           |                                                  |                                                 |                   |
| Patient 4      | Relapse                                        | rxeno 8                      | CNS           | yes                            |                           |                                                  |                                                 |                   |
| Patient 4      | Relapse                                        | rxeno 9                      | BM            | yes                            |                           |                                                  |                                                 |                   |
| Patient 4      | Relapse                                        | rxeno 9                      | CNS           | yes                            |                           |                                                  |                                                 |                   |
| Patient 4      | Relapse                                        | rxeno 10                     | BM            | yes                            |                           |                                                  |                                                 |                   |
| Patient 4      | Relapse                                        | rxeno 10                     | CNS           | yes                            |                           |                                                  |                                                 |                   |
| Patient 4      | Relapse                                        | rxeno 11                     | BM            | yes                            |                           |                                                  |                                                 |                   |
| Patient 4      | Relapse                                        | rxeno 11                     | CNS           | yes                            |                           |                                                  |                                                 |                   |
| Patient 6      | Relapse                                        | rxeno 2                      | BM            | yes                            |                           |                                                  |                                                 |                   |
| Patient 6      | Relapse                                        | rxeno 2                      | CNS           | yes                            |                           |                                                  |                                                 |                   |
| Patient 6      | Relapse                                        | rxeno 3                      | BM            | yes                            |                           |                                                  | yes                                             |                   |

|            |           |          |     |     |     |     |     |     |
|------------|-----------|----------|-----|-----|-----|-----|-----|-----|
| Patient 6  | Relapse   | rxeno 3  | CNS | yes |     |     |     |     |
| Patient 6  | Relapse   | rxeno 4  | BM  | yes | yes |     |     |     |
| Patient 6  | Relapse   | rxeno 4  | CNS | yes | yes |     |     |     |
| Patient 6  | Relapse   | rxeno 9  | BM  |     | yes |     |     |     |
| Patient 6  | Relapse   | rxeno 9  | CNS |     | yes |     |     |     |
| Patient 7  | Diagnosis | dxeno 3  | BM  | yes | yes |     |     |     |
| Patient 7  | Diagnosis | dxeno 3  | CNS | yes | yes |     |     |     |
| Patient 7  | Diagnosis | dxeno 5  | BM  | yes |     |     |     |     |
| Patient 7  | Diagnosis | dxeno 5  | CNS | yes |     |     |     |     |
| Patient 7  | Diagnosis | dxeno 8  | BM  |     |     |     | yes |     |
| Patient 7  | Diagnosis | dxeno 12 | BM  | yes |     |     |     |     |
| Patient 7  | Diagnosis | dxeno 12 | CNS | yes |     |     |     |     |
| Patient 7  | Relapse   | rxeno 1  | BM  | yes | yes |     |     |     |
| Patient 7  | Relapse   | rxeno 1  | CNS | yes | yes |     |     |     |
| Patient 7  | Relapse   | rxeno 2  | BM  | yes | yes |     |     |     |
| Patient 7  | Relapse   | rxeno 2  | CNS | yes | yes |     |     |     |
| Patient 7  | Relapse   | rxeno 3  | BM  | yes |     |     |     |     |
| Patient 7  | Relapse   | rxeno 3  | CNS | yes |     |     |     |     |
| Patient 7  | Relapse   | rxeno 4  | BM  | yes | yes |     |     |     |
| Patient 7  | Relapse   | rxeno 4  | CNS | yes | yes |     |     |     |
| Patient 7  | Relapse   | rxeno 5  | BM  | yes | yes |     |     |     |
| Patient 7  | Relapse   | rxeno 5  | CNS | yes | yes |     |     |     |
| Patient 7  | Relapse   | rxeno 6  | BM  | yes | yes |     |     |     |
| Patient 7  | Relapse   | rxeno 6  | CNS | yes | yes |     |     |     |
| Patient 7  | Relapse   | rxeno 7  | BM  | yes |     |     |     |     |
| Patient 7  | Relapse   | rxeno 7  | CNS | yes |     |     |     |     |
| Patient 7  | Relapse   | rxeno 8  | BM  | yes |     |     |     |     |
| Patient 7  | Relapse   | rxeno 8  | CNS | yes |     |     |     |     |
| Patient 7  | Relapse   | rxeno 10 | BM  | yes | yes |     |     |     |
| Patient 7  | Relapse   | rxeno 10 | CNS | yes | yes |     |     |     |
| Patient 7  | Relapse   | rxeno 11 | BM  | yes | yes |     |     |     |
| Patient 7  | Relapse   | rxeno 11 | CNS | yes | yes |     |     |     |
| Patient 7  | Relapse   | rxeno 12 | BM  | yes | yes |     |     |     |
| Patient 7  | Relapse   | rxeno 12 | CNS | yes | yes |     |     |     |
| Patient 7  | Relapse   | rxeno 20 | BM  | yes | yes |     |     |     |
| Patient 7  | Relapse   | rxeno 20 | CNS | yes | yes |     |     |     |
| Patient 9  | Diagnosis | dxeno 5  | BM  | yes |     |     |     |     |
| Patient 9  | Diagnosis | dxeno 5  | CNS | yes |     |     |     |     |
| Patient 9  | Relapse   | rxeno 1  | BM  | yes |     |     |     |     |
| Patient 9  | Relapse   | rxeno 1  | CNS | yes |     |     |     |     |
| Patient 10 | Relapse   | rxeno 2  | BM  | yes |     |     |     |     |
| Patient 10 | Relapse   | rxeno 2  | CNS | yes |     |     |     |     |
| Patient 10 | Relapse   | rxeno 3  | BM  | yes |     |     |     |     |
| Patient 10 | Relapse   | rxeno 3  | CNS | yes |     |     |     |     |
| Patient 10 | Relapse   | rxeno 4  | BM  | yes |     |     |     |     |
| Patient 10 | Relapse   | rxeno 4  | CNS | yes |     |     |     |     |
| Patient 10 | Relapse   | rxeno 12 | BM  | yes |     |     |     |     |
| Patient 10 | Relapse   | rxeno 12 | CNS | yes |     |     |     |     |
| Patient 11 | Diagnosis | dxeno 1  | BM  | yes |     |     |     | yes |
| Patient 11 | Diagnosis | dxeno 1  | CNS | yes |     |     |     | yes |
| Patient 11 | Diagnosis | dxeno 2  | BM  | yes | yes | yes |     | yes |
| Patient 11 | Diagnosis | dxeno 2  | CNS |     | yes | yes |     | yes |
| Patient 11 | Diagnosis | dxeno 3  | BM  | yes |     |     |     |     |
| Patient 11 | Diagnosis | dxeno 3  | CNS | yes |     |     |     |     |
| Patient 11 | Diagnosis | dxeno 4  | BM  | yes |     | yes |     |     |
| Patient 11 | Diagnosis | dxeno 4  | CNS | yes |     | yes |     |     |
| Patient 11 | Diagnosis | dxeno 5  | BM  | yes |     |     |     | yes |
| Patient 11 | Diagnosis | dxeno 5  | CNS |     |     |     |     | yes |
| Patient 11 | Diagnosis | dxeno 6  | BM  | yes | yes |     |     |     |
| Patient 11 | Diagnosis | dxeno 6  | CNS | yes | yes |     |     |     |
| Patient 11 | Diagnosis | dxeno 7  | BM  | yes |     |     |     |     |
| Patient 11 | Diagnosis | dxeno 7  | CNS | yes |     |     |     |     |
| Patient 11 | Diagnosis | dxeno 8  | BM  | yes | yes |     |     |     |
| Patient 11 | Diagnosis | dxeno 8  | CNS | yes | yes |     |     |     |
| Patient 11 | Diagnosis | dxeno 9  | BM  | yes |     |     |     |     |
| Patient 11 | Diagnosis | dxeno 9  | CNS | yes |     |     |     |     |

|            |           |          |     |     |     |     |  |                 |
|------------|-----------|----------|-----|-----|-----|-----|--|-----------------|
| Patient 11 | Diagnosis | dxeno 10 | BM  | yes |     |     |  |                 |
| Patient 11 | Diagnosis | dxeno 10 | CNS |     |     |     |  |                 |
| Patient 11 | Diagnosis | dxeno 11 | BM  | yes | yes |     |  | yes             |
| Patient 11 | Diagnosis | dxeno 11 | CNS | yes | yes |     |  | yes             |
| Patient 11 | Diagnosis | dxeno 12 | BM  | yes | yes |     |  |                 |
| Patient 11 | Diagnosis | dxeno 12 | CNS |     | yes |     |  |                 |
| Patient 11 | Relapse   | rxeno 1  | BM  | yes | yes | yes |  |                 |
| Patient 11 | Relapse   | rxeno 1  | CNS | yes | yes | yes |  |                 |
| Patient 11 | Relapse   | rxeno 2  | BM  | yes |     |     |  |                 |
| Patient 11 | Relapse   | rxeno 2  | CNS | yes |     |     |  |                 |
| Patient 11 | Relapse   | rxeno 3  | BM  | yes | yes | yes |  |                 |
| Patient 11 | Relapse   | rxeno 3  | CNS | yes | yes | yes |  |                 |
| Patient 11 | Relapse   | rxeno 4  | BM  | yes |     |     |  |                 |
| Patient 11 | Relapse   | rxeno 4  | CNS | yes |     |     |  |                 |
| Patient 11 | Relapse   | rxeno 5  | BM  | yes | yes |     |  |                 |
| Patient 11 | Relapse   | rxeno 5  | CNS | yes | yes |     |  |                 |
| Patient 11 | Relapse   | rxeno 6  | BM  | yes |     |     |  |                 |
| Patient 11 | Relapse   | rxeno 6  | CNS | yes |     |     |  |                 |
| Patient 11 | Relapse   | rxeno 7  | BM  | yes |     |     |  |                 |
| Patient 11 | Relapse   | rxeno 7  | CNS | yes |     |     |  |                 |
| Patient 11 | Relapse   | rxeno 8  | BM  | yes |     |     |  |                 |
| Patient 11 | Relapse   | rxeno 8  | CNS | yes |     |     |  |                 |
| Patient 11 | Relapse   | rxeno 9  | BM  | yes |     |     |  |                 |
| Patient 11 | Relapse   | rxeno 9  | CNS | yes |     |     |  |                 |
| Patient 11 | Relapse   | rxeno 10 | BM  | yes | yes |     |  |                 |
| Patient 11 | Relapse   | rxeno 10 | CNS | yes | yes |     |  |                 |
| Patient 11 | Relapse   | rxeno 11 | BM  | yes |     |     |  |                 |
| Patient 11 | Relapse   | rxeno 11 | CNS | yes |     |     |  |                 |
| Patient 11 | Relapse   | rxeno 12 | BM  | yes |     |     |  |                 |
| Patient 11 | Relapse   | rxeno 12 | CNS |     |     |     |  |                 |
| Patient 12 | Diagnosis | dxeno 1  | BM  | yes |     |     |  | yes             |
| Patient 12 | Diagnosis | dxeno 1  | CNS | yes |     |     |  | yes             |
| Patient 12 | Diagnosis | dxeno 2  | BM  | yes | yes |     |  |                 |
| Patient 12 | Diagnosis | dxeno 2  | CNS | yes | yes |     |  |                 |
| Patient 12 | Diagnosis | dxeno 3  | BM  | yes | yes | yes |  |                 |
| Patient 12 | Diagnosis | dxeno 3  | CNS | yes | yes | yes |  |                 |
| Patient 12 | Diagnosis | dxeno 4  | BM  | yes |     |     |  | yes             |
| Patient 12 | Diagnosis | dxeno 4  | CNS | yes |     |     |  | yes             |
| Patient 12 | Diagnosis | dxeno 5  | BM  | yes |     |     |  | yes             |
| Patient 12 | Diagnosis | dxeno 5  | CNS | yes |     |     |  | yes             |
| Patient 12 | Diagnosis | dxeno 6  | BM  | yes | yes | yes |  |                 |
| Patient 12 | Diagnosis | dxeno 6  | CNS | yes | yes | yes |  |                 |
| Patient 12 | Diagnosis | dxeno 7  | BM  | yes | yes |     |  |                 |
| Patient 12 | Diagnosis | dxeno 7  | CNS | yes | yes |     |  |                 |
| Patient 12 | Diagnosis | dxeno 8  | BM  | yes |     |     |  |                 |
| Patient 12 | Diagnosis | dxeno 8  | CNS | yes |     |     |  |                 |
| Patient 12 | Diagnosis | dxeno 9  | BM  | yes | yes |     |  |                 |
| Patient 12 | Diagnosis | dxeno 9  | CNS | yes | yes |     |  |                 |
| Patient 12 | Diagnosis | dxeno 10 | BM  | yes | yes |     |  |                 |
| Patient 12 | Diagnosis | dxeno 10 | CNS | yes | yes |     |  |                 |
| Patient 12 | Diagnosis | dxeno 11 | BM  | yes |     |     |  |                 |
| Patient 12 | Diagnosis | dxeno 11 | CNS |     |     |     |  |                 |
| Patient 12 | Diagnosis | dxeno 13 | BM  | yes |     |     |  |                 |
| Patient 12 | Diagnosis | dxeno 13 | CNS | yes |     |     |  |                 |
| Patient 12 | Diagnosis | dxeno 16 | BM  | yes | yes |     |  |                 |
| Patient 12 | Diagnosis | dxeno 16 | CNS |     | yes |     |  |                 |
| Patient 12 | Diagnosis | dxeno 17 | BM  | yes | yes |     |  |                 |
| Patient 12 | Diagnosis | dxeno 17 | CNS | yes | yes |     |  |                 |
| Patient 12 | Diagnosis | dxeno 31 | BM  | yes | yes |     |  |                 |
| Patient 12 | Diagnosis | dxeno 31 | CNS | yes | yes |     |  | Secondaries x 5 |
| Patient 12 | Diagnosis | dxeno 32 | BM  | yes |     |     |  |                 |
| Patient 12 | Diagnosis | dxeno 32 | CNS | yes |     |     |  |                 |
| Patient 12 | Relapse   | rxeno 1  | BM  | yes | yes | yes |  |                 |
| Patient 12 | Relapse   | rxeno 1  | CNS | yes | yes |     |  |                 |
| Patient 12 | Relapse   | rxeno 2  | BM  | yes | yes |     |  |                 |
| Patient 12 | Relapse   | rxeno 2  | CNS | yes | yes |     |  |                 |

|            |           |             |     |     |     |     |                 |
|------------|-----------|-------------|-----|-----|-----|-----|-----------------|
| Patient 12 | Relapse   | rxeno 3     | BM  | yes | yes |     |                 |
| Patient 12 | Relapse   | rxeno 3     | CNS | yes | yes |     |                 |
| Patient 12 | Relapse   | rxeno 4     | BM  | yes | yes |     |                 |
| Patient 12 | Relapse   | rxeno 4     | CNS | yes | yes |     |                 |
| Patient 12 | Relapse   | rxeno 5     | BM  | yes | yes |     |                 |
| Patient 12 | Relapse   | rxeno 5     | CNS | yes | yes |     |                 |
| Patient 12 | Relapse   | rxeno 6     | BM  | yes |     |     |                 |
| Patient 12 | Relapse   | rxeno 6     | CNS |     |     |     |                 |
| Patient 12 | Relapse   | rxeno 7     | BM  | yes |     |     |                 |
| Patient 12 | Relapse   | rxeno 7     | CNS | yes |     |     |                 |
| Patient 12 | Relapse   | rxeno 8     | BM  | yes |     |     |                 |
| Patient 12 | Relapse   | rxeno 8     | CNS | yes |     |     |                 |
| Patient 12 | Relapse   | rxeno 9     | BM  | yes | yes |     |                 |
| Patient 12 | Relapse   | rxeno 9     | CNS | yes | yes |     |                 |
| Patient 12 | Relapse   | rxeno 10    | BM  | yes | yes |     |                 |
| Patient 12 | Relapse   | rxeno 10    | CNS | yes | yes |     |                 |
| Patient 12 | Relapse   | rxeno 11    | BM  | yes | yes |     |                 |
| Patient 12 | Relapse   | rxeno 11    | CNS | yes | yes |     |                 |
| Patient 12 | Relapse   | rxeno 12    | BM  | yes | yes | yes |                 |
| Patient 12 | Relapse   | rxeno 12    | CNS | yes | yes | yes |                 |
| Patient 13 | Diagnosis | dxeno 1     | BM  | yes | yes |     |                 |
| Patient 13 | Diagnosis | dxeno 1     | CNS | yes | yes |     |                 |
| Patient 13 | Diagnosis | dxeno 2     | BM  | yes |     |     |                 |
| Patient 13 | Diagnosis | dxeno 2     | CNS | yes |     |     |                 |
| Patient 13 | Diagnosis | dxeno 3     | BM  | yes |     |     |                 |
| Patient 13 | Diagnosis | dxeno 3     | CNS | yes |     |     |                 |
| Patient 13 | Diagnosis | dxeno 4     | BM  | yes |     |     |                 |
| Patient 13 | Diagnosis | dxeno 4     | CNS | yes |     |     |                 |
| Patient 13 | Diagnosis | dxeno 5     | BM  | yes |     |     |                 |
| Patient 13 | Diagnosis | dxeno 5     | CNS | yes |     |     |                 |
| Patient 13 | Diagnosis | dxeno 6     | BM  | yes |     |     |                 |
| Patient 13 | Diagnosis | dxeno 6     | CNS | yes |     |     |                 |
| Patient 13 | Relapse   | rxeno 1     | BM  | yes |     |     |                 |
| Patient 13 | Relapse   | rxeno 1     | CNS | yes |     |     |                 |
| Patient 13 | Relapse   | rxeno 2     | BM  | yes |     |     |                 |
| Patient 13 | Relapse   | rxeno 2     | CNS | yes |     |     |                 |
| Patient 13 | Relapse   | rxeno 3     | BM  | yes |     |     |                 |
| Patient 13 | Relapse   | rxeno 3     | CNS | yes |     |     |                 |
| Patient 13 | Relapse   | rxeno 6     | BM  | yes |     |     |                 |
| Patient 13 | Relapse   | rxeno 6     | CNS | yes |     |     |                 |
| Patient 13 | Relapse   | rxeno 7     | BM  | yes |     |     |                 |
| Patient 13 | Relapse   | rxeno 7     | CNS | yes |     |     |                 |
| Patient 13 | Relapse   | rxeno 9     | BM  | yes |     |     |                 |
| Patient 13 | Relapse   | rxeno 9     | CNS | yes |     |     |                 |
| Patient 13 | Relapse   | rxeno 12    | BM  | yes |     |     |                 |
| Patient 13 | Relapse   | rxeno 12    | CNS | yes |     |     |                 |
| Patient 15 | Diagnosis | xeno 1      | BM  |     |     | yes | yes             |
| Patient 15 | Diagnosis | xeno 1      | CNS |     |     |     | yes             |
| Patient 15 | Diagnosis | xeno 2      | BM  |     | yes | yes | yes             |
| Patient 15 | Diagnosis | xeno 2      | CNS |     | yes |     | yes             |
| Patient 15 | Diagnosis | xeno 3      | BM  |     |     |     | yes             |
| Patient 15 | Diagnosis | xeno 3      | CNS |     |     |     | yes             |
| Patient 15 | Diagnosis | xeno 4      | BM  |     |     |     | yes             |
| Patient 15 | Diagnosis | xeno 4      | CNS |     |     |     | yes             |
| Patient 15 | Diagnosis | xeno 5      | BM  |     | yes |     | yes             |
| Patient 15 | Diagnosis | xeno 5      | CNS |     | yes | yes | yes             |
| Patient 15 | Diagnosis | xeno 6      | BM  |     | yes |     | yes             |
| Patient 15 | Diagnosis | xeno 6      | CNS |     | yes |     | yes             |
| Patient 15 | Diagnosis | secondaries | CNS |     |     |     | Secondaries x 5 |

Supplementary Table 2. B-ALL xenografts used in current study. Patient sample, diagnosis / relapse status, xenograft number, tissue site (BM or CNS) are listed, along with technical methods applied to each xenograft. ‘Secondaries’ refers to the re-engraftment of cells that are derived from a primary xenograft and have therefore had one passage in an NSG mouse. ‘Tertiary’ refers to the re-engraftment of cells that are derived from a primary xenograft and have therefore had two passages in an NSG mouse.
