# Supplementary material
Source: PubMed Central journal article supplement (PMC9783958)
Supplement: bcd-20-0216_supplementary_table_3_suppst3.pdf [file bcd-20-0216_supplementary_table_3_suppst3.pdf]

**Supplementary Table 3**

| Gene Symbol     | Abundance Ratio: (BM) / (CNS) | Abundance Ratio Adj. P-Value |
|-----------------|-------------------------------|------------------------------|
| NASP            | 0.01                          | 1.096E-16                    |
| TXNRD1          | 0.01                          | 1.096E-16                    |
| SERPINB4        | 0.01                          | 1.096E-16                    |
| CAMK2B          | 0.01                          | 1.096E-16                    |
| DSG1            | 0.01                          | 1.096E-16                    |
| CKMT1A; CKMT1B  | 0.01                          | 1.096E-16                    |
| ATP2B2          | 0.01                          | 1.096E-16                    |
| C17orf49        | 0.01                          | 1.096E-16                    |
| CRMP1           | 0.01                          | 1.096E-16                    |
| CDC42           | 0.01                          | 1.096E-16                    |
| MBP             | 0.01                          | 1.096E-16                    |
| VSNL1           | 0.01                          | 1.096E-16                    |
| KRT13           | 0.01                          | 1.096E-16                    |
| SYN2            | 0.01                          | 1.096E-16                    |
| SI00A7A         | 0.01                          | 1.096E-16                    |
| KRT77           | 0.01                          | 1.096E-16                    |
| CNTN1           | 0.01                          | 1.096E-16                    |
| HSPA4L          | 0.01                          | 1.096E-16                    |
| TAGLN3          | 0.01                          | 1.096E-16                    |
| SLC1A2          | 0.01                          | 1.096E-16                    |
| SLC12A5         | 0.01                          | 1.096E-16                    |
| LINS4           | 0.01                          | 1.096E-16                    |
| SH3GL2          | 0.01                          | 1.096E-16                    |
| ATP1B2          | 0.01                          | 1.096E-16                    |
| ACTL6B          | 0.01                          | 1.096E-16                    |
| SEPT8           | 0.01                          | 1.096E-16                    |
| TGM3            | 0.01                          | 1.096E-16                    |
| SNAP91          | 0.01                          | 1.096E-16                    |
| ATP1B1          | 0.01                          | 1.096E-16                    |
| NAV1            | 0.01                          | 1.096E-16                    |
| CALML3          | 0.01                          | 1.096E-16                    |
| RHOB            | 0.01                          | 1.096E-16                    |
| GPM6A           | 0.01                          | 1.096E-16                    |
| STX1A           | 0.01                          | 1.096E-16                    |
| ANK2            | 0.01                          | 1.096E-16                    |
| SLC4A4          | 0.01                          | 1.096E-16                    |
| MAPT            | 0.01                          | 1.096E-16                    |
| CLIC6           | 0.01                          | 1.096E-16                    |
| HIP1            | 0.01                          | 1.096E-16                    |
| CALB2           | 0.01                          | 1.096E-16                    |
| PCCB            | 0.01                          | 1.096E-16                    |
| FLG2            | 0.01                          | 1.096E-16                    |
| NEFH            | 0.01                          | 1.096E-16                    |
| ASPRV1          | 0.01                          | 1.096E-16                    |
| LRP1            | 0.01                          | 1.096E-16                    |
| PRCP            | 0.01                          | 1.096E-16                    |
| MAOB            | 0.01                          | 1.096E-16                    |
| TPPP            | 0.01                          | 1.096E-16                    |
| RG810           | 0.01                          | 1.096E-16                    |
| SNCB            | 0.01                          | 1.096E-16                    |
| ISCU            | 0.01                          | 1.096E-16                    |
| SYT2            | 0.01                          | 1.096E-16                    |
| AQP1            | 0.01                          | 1.096E-16                    |
| ACSL6           | 0.01                          | 1.096E-16                    |
| DMX12           | 0.01                          | 1.096E-16                    |
| UBP1            | 0.01                          | 1.096E-16                    |
| IGHG2           | 0.01                          | 1.096E-16                    |
| IGFBP2          | 0.01                          | 1.096E-16                    |
| LRRC20          | 0.01                          | 1.096E-16                    |
| SH2D3C          | 0.01                          | 1.096E-16                    |
| GABARAPL1       | 0.01                          | 1.096E-16                    |
| SYNGAP1         | 0.01                          | 1.096E-16                    |
| HSPA12A         | 0.01                          | 1.096E-16                    |
| GDAP1           | 0.01                          | 1.096E-16                    |
| PRKCG           | 0.01                          | 1.096E-16                    |
| SFXN5           | 0.01                          | 1.096E-16                    |
| ATP6V0A1        | 0.01                          | 1.096E-16                    |
| PGM2L1          | 0.01                          | 1.096E-16                    |
| PACSIN1         | 0.01                          | 1.096E-16                    |
| NTSE            | 0.01                          | 1.096E-16                    |
| RBP4            | 0.01                          | 1.096E-16                    |
| MPLKIP          | 0.01                          | 1.096E-16                    |
| SEPT4           | 0.01                          | 1.096E-16                    |
| VAMP1           | 0.01                          | 1.096E-16                    |
| NTM             | 0.01                          | 1.096E-16                    |
| ACTR6           | 0.01                          | 1.096E-16                    |
| PLCB1           | 0.01                          | 1.096E-16                    |
| CPLX2           | 0.01                          | 1.096E-16                    |
| SYNJ1           | 0.01                          | 1.096E-16                    |
| SLC44A1         | 0.01                          | 1.096E-16                    |
| C8B             | 0.01                          | 1.096E-16                    |
| DAM1            | 0.01                          | 1.096E-16                    |
| CORO2B          | 0.01                          | 1.096E-16                    |
| ANAPC1          | 0.01                          | 1.096E-16                    |
| PTPN18          | 0.01                          | 1.096E-16                    |
| TSC1            | 0.01                          | 1.096E-16                    |
| MED31           | 0.01                          | 1.096E-16                    |
| PURB            | 0.01                          | 1.096E-16                    |
| OPCML           | 0.01                          | 1.096E-16                    |
| SLC12A6         | 0.01                          | 1.096E-16                    |
| KMT2B; MLL4     | 0.01                          | 1.096E-16                    |
| NME3            | 0.01                          | 1.096E-16                    |
| EPHA7           | 0.01                          | 1.096E-16                    |
| C16orf88; KNOP1 | 0.01                          | 1.096E-16                    |
| TNR             | 0.01                          | 1.096E-16                    |
| TMOD2           | 0.01                          | 1.096E-16                    |
| TYMP            | 0.01                          | 1.096E-16                    |
| PCP4            | 0.01                          | 1.096E-16                    |
| PFN2            | 0.01                          | 1.096E-16                    |
| NFASC           | 0.01                          | 1.096E-16                    |
| CDH13           | 0.01                          | 1.096E-16                    |
| SERPINA10       | 0.081                         | 4.80453E-15                  |
| TRAPPC4         | 0.082                         | 1.096E-16                    |
| FOXO3           | 0.082                         | 3.82275E-13                  |

| Gene Symbol         | Abundance Ratio: (BM) / (CNS) | Abundance Ratio Adj. P-Value |
|---------------------|-------------------------------|------------------------------|
| CACNA2D1            | 0.01                          | 1.096E-16                    |
| CADM3               | 0.01                          | 1.096E-16                    |
| SYNE1               | 0.01                          | 1.096E-16                    |
| CRCP                | 0.01                          | 1.096E-16                    |
| PTGS1               | 0.01                          | 1.096E-16                    |
| NCAM1               | 0.01                          | 1.096E-16                    |
| DERL2               | 0.01                          | 1.096E-16                    |
| NBR1                | 0.01                          | 1.096E-16                    |
| FBXO38              | 0.01                          | 1.096E-16                    |
| NT5DC3              | 0.01                          | 1.096E-16                    |
| ATP6V1G2            | 0.01                          | 1.096E-16                    |
| PTMS                | 0.01                          | 1.096E-16                    |
| CEBPG               | 0.01                          | 1.096E-16                    |
| LGII                | 0.01                          | 1.096E-16                    |
| SSH2                | 0.01                          | 1.096E-16                    |
| NCCRP1              | 0.01                          | 1.096E-16                    |
| POF1B               | 0.01                          | 1.096E-16                    |
| ZNF281              | 0.01                          | 1.096E-16                    |
| GPD1                | 0.01                          | 1.096E-16                    |
| AMY1C; AMY1A; AMY1B | 0.01                          | 1.096E-16                    |
| SORBS3              | 0.01                          | 1.096E-16                    |
| ATL1                | 0.01                          | 1.096E-16                    |
| NDRG2               | 0.01                          | 1.096E-16                    |
| SYP                 | 0.01                          | 1.096E-16                    |
| TGFBI               | 0.01                          | 1.096E-16                    |
| C1QTNF5             | 0.01                          | 1.096E-16                    |
| BIN2                | 0.01                          | 1.096E-16                    |
| ABCC1               | 0.01                          | 1.096E-16                    |
| LPHN2; ADGRL2       | 0.01                          | 1.096E-16                    |
| PAK4                | 0.01                          | 1.096E-16                    |
| MF2; MELTF          | 0.01                          | 1.096E-16                    |
| POLR3K              | 0.01                          | 1.096E-16                    |
| AGTRAP              | 0.01                          | 1.096E-16                    |
| UBXN6               | 0.01                          | 1.096E-16                    |
| VKORC1L1            | 0.01                          | 1.096E-16                    |
| NADSYN1             | 0.01                          | 1.096E-16                    |
| SEPP1; SELENOP      | 0.01                          | 1.096E-16                    |
| PHF11               | 0.01                          | 1.096E-16                    |
| FXYD7               | 0.01                          | 1.096E-16                    |
| LBP                 | 0.01                          | 1.096E-16                    |
| C12orf29            | 0.01                          | 1.096E-16                    |
| GJA1                | 0.01                          | 1.096E-16                    |
| DSC3                | 0.01                          | 1.096E-16                    |
| DCLK1               | 0.01                          | 1.096E-16                    |
| GRM3                | 0.01                          | 1.096E-16                    |
| ADAP1               | 0.01                          | 1.096E-16                    |
| CTS2; CTSV          | 0.01                          | 1.096E-16                    |
| C19orf53            | 0.01                          | 1.096E-16                    |
| LCAT                | 0.01                          | 1.096E-16                    |
| KIAA1045; PHF24     | 0.01                          | 1.096E-16                    |
| CTNND2              | 0.01                          | 1.096E-16                    |
| DYNLT3              | 0.01                          | 1.096E-16                    |
| DENND4A             | 0.01                          | 1.096E-16                    |
| FBXO11              | 0.01                          | 1.096E-16                    |
| CSAD                | 0.01                          | 1.096E-16                    |
| MAP4K2              | 0.01                          | 1.096E-16                    |
| SLC1A3              | 0.01                          | 1.096E-16                    |
| C1orf105            | 0.01                          | 1.096E-16                    |
| APOA2               | 0.01                          | 1.096E-16                    |
| KRTAP3-1            | 0.01                          | 1.096E-16                    |
| GJD4                | 0.01                          | 1.096E-16                    |
| GLIPR1L2            | 0.01                          | 1.096E-16                    |
| MAG                 | 0.01                          | 1.096E-16                    |
| ELOF1               | 0.01                          | 1.096E-16                    |
| HMBOX1              | 0.01                          | 1.096E-16                    |
| NCS1                | 0.01                          | 1.096E-16                    |
| IGF2                | 0.01                          | 1.096E-16                    |
| COL5A1              | 0.01                          | 1.096E-16                    |
|                     | 0.01                          | 1.096E-16                    |
| STK31               | 0.01                          | 1.096E-16                    |
| SMYD5               | 0.01                          | 1.096E-16                    |
| HDAC8               | 0.01                          | 1.096E-16                    |
| PIP                 | 0.01                          | 1.096E-16                    |
| SI00A2              | 0.01                          | 1.096E-16                    |
| NR4A1               | 0.01                          | 1.096E-16                    |
| HAL                 | 0.01                          | 1.096E-16                    |
| RNF10               | 0.01                          | 1.096E-16                    |
| THAP1               | 0.01                          | 1.096E-16                    |
| TMEM230             | 0.019                         | 1.096E-16                    |
| USF2                | 0.025                         | 1.096E-16                    |
| MBP                 | 0.028                         | 1.096E-16                    |
| NEFL                | 0.028                         | 1.096E-16                    |
| OGDHL               | 0.032                         | 1.096E-16                    |
| GPR179              | 0.036                         | 1.096E-16                    |
| SAR1B               | 0.038                         | 1.096E-16                    |
| PSD3                | 0.042                         | 1.18491E-13                  |
| CTSH                | 0.049                         | 3.68971E-12                  |
| AMBP                | 0.054                         | 6.0928E-13                   |
| POLR3A              | 0.056                         | 4.81753E-13                  |
| NAPB                | 0.057                         | 1.096E-16                    |
| C9                  | 0.061                         | 1.096E-16                    |
| KRT86               | 0.065                         | 2.92453E-11                  |
| LPCAT2              | 0.068                         | 1.096E-16                    |
| MFAP4               | 0.068                         | 1.096E-16                    |
| PRRC2B              | 0.068                         | 3.01142E-11                  |
| BANP                | 0.069                         | 2.75751E-11                  |
| PIK2                | 0.072                         | 1.096E-16                    |
| DDX12P              | 0.079                         | 1.096E-16                    |
| RBBP9               | 0.079                         | 1.096E-16                    |
| POSTN               | 0.081                         | 1.096E-16                    |
| CCDC37; CFAP100     | 0.081                         | 1.096E-16                    |
| KRT5                | 0.447                         | 8.17339E-09                  |
| APOB                | 0.45                          | 9.45877E-05                  |
| SYN1                | 0.457                         | 1.46149E-05                  |

|                            |       |             |
|----------------------------|-------|-------------|
| NARF                       | 0.085 | 1.14198E-09 |
| ICOSLG; LOC102723996       | 0.089 | 1.096E-16   |
| HLA-B                      | 0.093 | 1.096E-16   |
| TSPYL2                     | 0.093 | 1.096E-16   |
| CADPS                      | 0.094 | 1.096E-16   |
| PRR12                      | 0.095 | 1.096E-16   |
| SYT1                       | 0.096 | 1.096E-16   |
| TBC1D10A                   | 0.097 | 1.46646E-08 |
| LRPAP1                     | 0.101 | 4.73882E-12 |
| ADHFE1                     | 0.101 | 6.7615E-11  |
| DTD1                       | 0.101 | 1.96254E-10 |
| PLP1                       | 0.106 | 1.096E-16   |
| CDSN                       | 0.106 | 6.8999E-14  |
| TNIP2                      | 0.107 | 3.75804E-08 |
| ATPIA3                     | 0.111 | 1.096E-16   |
| PROS1                      | 0.111 | 2.3438E-07  |
| TUBB2A                     | 0.112 | 1.096E-16   |
| SPAG5                      | 0.113 | 1.91718E-14 |
| CMC2                       | 0.115 | 4.80453E-15 |
| ZMAT3                      | 0.118 | 1.096E-16   |
| GNAO1                      | 0.119 | 1.096E-16   |
| SNAP25                     | 0.12  | 1.096E-16   |
| DUS2L; DUS2                | 0.121 | 3.30685E-07 |
| CDH11                      | 0.123 | 2.83327E-09 |
| STATH                      | 0.124 | 1.096E-16   |
| INA                        | 0.124 | 8.08643E-13 |
| C7orf26                    | 0.133 | 4.47001E-06 |
| C7                         | 0.141 | 5.47376E-09 |
| CAMK2A                     | 0.142 | 1.096E-16   |
| AMPH                       | 0.149 | 4.0314E-07  |
| MATN1                      | 0.154 | 8.12104E-12 |
| BR13BP                     | 0.165 | 2.59207E-05 |
| SERPINA7                   | 0.176 | 1.096E-16   |
| ZBTB11                     | 0.18  | 1.04609E-05 |
| CYB5R4                     | 0.183 | 2.13479E-12 |
| OCLAD2                     | 0.188 | 0.000104367 |
| FAM115A; TCAF1             | 0.194 | 1.10178E-12 |
| NCALD                      | 0.199 | 2.5419E-09  |
| SEPT3                      | 0.204 | 3.96482E-06 |
| MARC2                      | 0.215 | 0.000473874 |
| FBP2                       | 0.225 | 5.03281E-07 |
| MGAT4C                     | 0.226 | 1.096E-16   |
| SLC30A9                    | 0.233 | 6.78108E-07 |
| FBXO22                     | 0.24  | 9.9777E-09  |
| NPTN                       | 0.247 | 6.32211E-09 |
| SERPINF1                   | 0.247 | 7.47598E-09 |
| CPLX1                      | 0.25  | 0.00149466  |
| CASP14                     | 0.256 | 1.12528E-06 |
| ZNF518B                    | 0.263 | 6.9516E-08  |
| TUBB2B                     | 0.271 | 1.096E-16   |
| FBLN1                      | 0.28  | 1.35649E-07 |
| MEIS1                      | 0.286 | 0.000188665 |
| CCDC146                    | 0.288 | 0.002246062 |
| UBE2A                      | 0.291 | 2.93177E-05 |
| GALE                       | 0.294 | 1.26138E-06 |
| AFP                        | 0.297 | 1.096E-16   |
| DSCC1                      | 0.299 | 6.01694E-05 |
| HRNR                       | 0.302 | 0.003560099 |
| IRF4                       | 0.303 | 0.012449989 |
| INS-IGF2; INS              | 0.314 | 1.41005E-09 |
|                            | 0.317 | 0.000517913 |
| SNCA                       | 0.32  | 1.096E-16   |
| UBE2D1                     | 0.343 | 9.09856E-06 |
| CKB                        | 0.356 | 5.02231E-10 |
| ITIH1                      | 0.356 | 0.005398844 |
| VPREB1                     | 0.358 | 1.48524E-05 |
| SIKE1                      | 0.36  | 0.000521914 |
| GCFC2                      | 0.36  | 0.003298997 |
| KRT2                       | 0.365 | 1.096E-16   |
| KRT9                       | 0.37  | 1.096E-16   |
| LTF                        | 0.371 | 1.67888E-14 |
| CTTNBP2NL                  | 0.376 | 0.00596961  |
| ALDOC                      | 0.377 | 2.40614E-15 |
| ABAT                       | 0.378 | 2.46955E-07 |
| A2M                        | 0.381 | 6.3993E-11  |
| TMPPRS7                    | 0.381 | 0.000406908 |
| LSP1                       | 0.385 | 1.3787E-07  |
| PRMT6                      | 0.391 | 0.007243903 |
| ANKRD35                    | 0.393 | 0.001478093 |
| FAM48A; SUP120H            | 0.393 | 0.035674793 |
| TRAF6                      | 0.395 | 4.47557E-06 |
| SERPING1                   | 0.395 | 0.000395442 |
| METTL14                    | 0.401 | 0.032014674 |
| ATPIA2                     | 0.402 | 7.26587E-06 |
| HPCAL4                     | 0.405 | 0.000332295 |
| KIF21B                     | 0.406 | 0.002279068 |
| CLEC3B                     | 0.411 | 0.000396896 |
| STX1B                      | 0.412 | 9.21817E-07 |
| IGHA1                      | 0.426 | 0.001039995 |
| AUH                        | 0.426 | 0.005023057 |
| PBX3                       | 0.434 | 0.009325132 |
| HIRA                       | 0.434 | 0.026743456 |
| DHRS7                      | 0.435 | 0.001130037 |
| EMB                        | 0.439 | 4.64186E-05 |
| ALB                        | 0.444 | 1.12189E-11 |
| PPARD                      | 0.445 | 0.003160198 |
| HIF0                       | 0.447 | 1.62213E-11 |
| SAMHD1                     | 1.748 | 0.00181271  |
| HIST2H3A; HIST2H3C; HIST2H | 1.772 | 0.000371391 |
| NDUFA6                     | 1.803 | 0.027973655 |
| LPXN                       | 1.816 | 0.022834251 |
| ACTA1                      | 1.861 | 1.72331E-05 |
| BANK1                      | 1.865 | 0.001384632 |
| MRPS34                     | 1.868 | 0.009591287 |
| SEC61B                     | 1.87  | 0.035876576 |
| CPT1A                      | 1.877 | 0.007008131 |

|                  |       |             |
|------------------|-------|-------------|
| ITIH2            | 0.458 | 2.95658E-08 |
| DNM1             | 0.468 | 0.000248931 |
| FLG              | 0.474 | 0.020742522 |
| KRT178           | 0.478 | 0.049424665 |
| MCOLN2           | 0.481 | 0.002163717 |
| PCNT             | 0.481 | 0.002392455 |
| LIN7A            | 0.484 | 0.011223368 |
| FBXO7            | 0.491 | 0.031716714 |
| DSC1             | 0.493 | 0.04113762  |
| RAB4B            | 0.494 | 0.001028745 |
| ASAP2            | 0.496 | 1.61024E-06 |
| APOH             | 0.498 | 0.00120561  |
| HLA-A            | 0.5   | 0.002638561 |
| GNG7             | 0.512 | 0.001580519 |
| ZC4H2            | 0.514 | 0.03972233  |
| KRT14            | 0.515 | 3.47999E-06 |
| CALML5           | 0.515 | 0.000115481 |
| APOA1            | 0.518 | 1.23015E-06 |
| DCD              | 0.52  | 0.000163441 |
| KBTBDB8          | 0.521 | 0.019469519 |
| PKLR             | 0.523 | 0.041775582 |
| PC               | 0.526 | 0.005611635 |
| LDLRAP1          | 0.527 | 0.046714407 |
| OVCA2            | 0.531 | 0.002504408 |
| GFAP             | 0.542 | 0.00475395  |
| PZP              | 0.542 | 0.016698941 |
| OXR1             | 0.542 | 0.025614711 |
| SEPT5            | 0.545 | 0.001911077 |
| SYPL1            | 0.552 | 0.000684232 |
| THNSL1           | 0.552 | 0.031556391 |
| PKIG             | 0.555 | 0.039639385 |
| TUBB3            | 0.556 | 7.46497E-05 |
| CAMK2G           | 0.564 | 7.63534E-05 |
| KIAA0586         | 0.564 | 0.016089296 |
| C19orf77; SMIM24 | 0.572 | 0.003464737 |
| FSCN1            | 0.574 | 4.77329E-05 |
| C12orf57         | 0.576 | 0.003840035 |
| KRT10            | 0.586 | 1.29648E-05 |
| MAP1A            | 0.587 | 0.032202008 |
| HSPB1            | 0.588 | 1.47339E-05 |
| ENO3             | 0.594 | 0.001496128 |
| TUBA4A           | 0.601 | 0.000201477 |
| C3               | 0.61  | 0.000644408 |
| QDPR             | 0.611 | 0.000876705 |
| KRT1             | 0.624 | 0.000141293 |
| PALM             | 0.635 | 0.019389557 |
| MECP2            | 0.636 | 0.005882546 |
| SLC25A4          | 0.638 | 0.004758425 |
| SLC25A22         | 0.641 | 0.002669553 |
| MYOM1            | 0.642 | 0.044615899 |
| ITP1             | 0.644 | 0.000431824 |
| TMA7             | 0.646 | 0.001527212 |
| SERPINF2         | 0.648 | 0.002322727 |
| ERH              | 0.658 | 0.005459988 |
| PCYT2            | 0.663 | 0.03796611  |
| SOD1             | 0.667 | 0.001434552 |
| NDRG1            | 0.672 | 0.008221367 |
| HIFX             | 0.675 | 0.002061829 |
| UCHL1            | 0.678 | 0.025731825 |
| PTMA             | 0.683 | 0.003051553 |
| CLTB             | 0.683 | 0.026713478 |
| EIF4A2           | 0.686 | 0.006965526 |
| LEFT1            | 0.686 | 0.009731041 |
| SUMO2            | 0.689 | 0.017512048 |
| PPP3CA           | 0.69  | 0.007854529 |
| EDF1             | 0.69  | 0.008377604 |
| NUCB1            | 0.69  | 0.026352667 |
| RNF2             | 0.695 | 0.036744703 |
| KTN1             | 0.698 | 0.008725818 |
| SNRPA            | 0.699 | 0.008863765 |
| HSPA1A; HSPA1B   | 0.703 | 0.006761352 |
| ZNF638           | 0.715 | 0.043916761 |
| ZC3HAV1L         | 0.718 | 0.045914038 |
| TXN              | 0.727 | 0.029629856 |
| CNBP             | 0.732 | 0.019808901 |
| ATPIA1           | 0.732 | 0.020825932 |
| GDI1             | 0.733 | 0.037021628 |
| GBE1             | 0.737 | 0.043506207 |
| SERBP1           | 0.749 | 0.034490011 |
| ATP5H            | 1.452 | 0.045614787 |
| SUCLG2           | 1.463 | 0.034603362 |
| MYL12B; MYL12A   | 1.537 | 0.011016135 |
| MRPL11           | 1.554 | 0.037778267 |
| TTN              | 1.554 | 0.041775582 |
| TYMS             | 1.594 | 0.025390353 |
| FMNL1            | 1.615 | 0.012590111 |
| PTPRC            | 1.65  | 0.001387251 |
| HBB              | 1.654 | 0.001244852 |
| FAM82B; RMDN1    | 1.664 | 0.005820084 |
| UGT3A2           | 1.677 | 0.005073463 |
| FTL              | 1.702 | 0.016239846 |
| ACTN3            | 1.702 | 0.044516433 |
| C14orf2          | 1.706 | 0.027348627 |
| ATP5I            | 1.715 | 0.000732571 |
| NDUFA5           | 1.723 | 0.004076112 |
| MYH9             | 1.732 | 0.000261473 |
| MYO1G            | 1.745 | 0.048215951 |
| SLC34A2          | 4.616 | 5.79384E-08 |
| HMX3             | 4.639 | 0.001827513 |
| ZNFX1            | 4.642 | 2.29853E-06 |
| MYH10            | 4.645 | 6.14523E-09 |
| PMP2             | 4.657 | 8.22799E-08 |
| DDX19B           | 4.807 | 4.01518E-07 |
| KIAA0513         | 5.196 | 6.34465E-05 |
| PLD4             | 5.256 | 7.23452E-09 |
| AHNAK            | 5.426 | 1.096E-16   |

|                      |       |             |
|----------------------|-------|-------------|
| HBA2; HBA1           | 1.895 | 8.12664E-06 |
| NDUFA3               | 1.897 | 0.047201984 |
| CFL2                 | 1.9   | 0.007292688 |
| GY51                 | 1.914 | 0.040524347 |
| HLA-DRB1             | 1.935 | 0.003464737 |
| SERPINH1             | 1.972 | 8.40934E-05 |
| ATP2A3               | 1.979 | 9.15298E-05 |
| CA2                  | 1.982 | 0.002200146 |
| PDF                  | 2.012 | 0.01438861  |
| HLA-A; LOC100507703  | 2.019 | 0.004211435 |
| ACTC1                | 2.083 | 0.000604887 |
| C17orf61; TMEM256    | 2.09  | 0.002374275 |
| SLC22A8              | 2.111 | 0.002905721 |
| FTH1                 | 2.115 | 8.722E-07   |
| HMG3                 | 2.165 | 3.35988E-06 |
| HLA-DRB1             | 2.176 | 0.001845926 |
| NACAP1               | 2.187 | 0.04369368  |
| FDX1                 | 2.231 | 0.03032974  |
| MYBPC2               | 2.232 | 0.000119958 |
| DES                  | 2.242 | 0.028697724 |
| SSR3                 | 2.256 | 0.003960434 |
| SESN3                | 2.257 | 0.000171783 |
| CEP97                | 2.258 | 0.035674793 |
| ATP8                 | 2.281 | 0.006447863 |
| MRPS17               | 2.348 | 3.10103E-05 |
| MZT1                 | 2.353 | 0.00025479  |
| MRPL16               | 2.365 | 0.000371391 |
| TRAPPC8              | 2.373 | 0.017782953 |
| PYGM                 | 2.38  | 0.014554519 |
| HLA-DRB3             | 2.41  | 0.000954418 |
| SVIP                 | 2.412 | 0.003909279 |
| RPF1                 | 2.457 | 0.007862976 |
| COPS7A               | 2.464 | 0.043582316 |
| ECI2                 | 2.486 | 0.020553493 |
| ARF4                 | 2.489 | 0.000290047 |
| TP53                 | 2.496 | 3.71262E-08 |
| SYNRG                | 2.556 | 0.031299626 |
| JTB                  | 2.583 | 0.005009068 |
| NDUFB1               | 2.597 | 0.000190776 |
| HERC5                | 2.599 | 0.004649749 |
| CDKN2AIPNL           | 2.62  | 0.003526575 |
| STK11P               | 2.638 | 0.005018613 |
| PTRPS                | 2.659 | 0.003508016 |
| RSL24D1              | 2.663 | 0.000315997 |
| NDUFB7               | 2.683 | 0.004141904 |
| YIPF5                | 2.689 | 0.006589896 |
| LCK                  | 2.689 | 0.01438421  |
| AGL                  | 2.698 | 0.049436277 |
| PVALB                | 2.699 | 0.002496967 |
| ATP2A1               | 2.715 | 6.78918E-11 |
| RPUSD3               | 2.721 | 0.003051553 |
| PALLD                | 2.776 | 9.32137E-06 |
| SLC27A3              | 2.791 | 0.001418917 |
| IFI30                | 2.793 | 0.001939544 |
| TRIM4                | 2.818 | 0.006640589 |
| COQ3                 | 2.832 | 0.001295674 |
| TRIM65               | 2.873 | 0.000908939 |
| RGCC                 | 2.901 | 0.002279068 |
| NSUN4                | 3.003 | 6.28014E-05 |
| CASP4                | 3.012 | 0.003298997 |
| COMMD6               | 3.022 | 0.020669477 |
| AZGP1                | 3.041 | 0.000479894 |
| MYH7                 | 3.116 | 4.75848E-09 |
| FNDC3A               | 3.225 | 0.009447126 |
| PPH1A1               | 3.245 | 0.00310938  |
| OGN                  | 3.268 | 0.01701414  |
| HLA-F                | 3.271 | 0.008141499 |
| MYH1                 | 3.348 | 1.096E-16   |
| ABHD16A              | 3.412 | 0.048704552 |
| ZNF362               | 3.42  | 0.028277775 |
| ADD2                 | 3.426 | 4.77329E-05 |
| SDHD                 | 3.479 | 5.23411E-05 |
| MYL12A               | 3.543 | 3.00584E-06 |
| PPOX                 | 3.557 | 0.019588375 |
| TSNS4                | 3.558 | 0.00020204  |
| PCBP2                | 3.595 | 1.43079E-08 |
| MYH4                 | 3.671 | 1.096E-16   |
| GSTCD                | 3.719 | 0.046868275 |
| ALDH2                | 3.746 | 1.096E-16   |
| TMX2                 | 3.902 | 6.16042E-06 |
| RPL22L1              | 3.909 | 3.77003E-06 |
| KIAA1614             | 4.012 | 1.096E-16   |
| MAZ                  | 4.079 | 0.001427363 |
| FOS                  | 4.132 | 5.48851E-07 |
| SULT1A1              | 4.18  | 1.86462E-06 |
| NEDD4                | 4.217 | 0.023312744 |
| KRT6B                | 4.313 | 1.01647E-10 |
| SLC25A15             | 4.406 | 0.005689526 |
| ANXA1                | 4.416 | 1.096E-16   |
| IGJ; JCHAIN          | 4.528 | 3.02694E-08 |
| ESF1                 | 4.582 | 1.23807E-06 |
| KRT176               | 100   | 1.096E-16   |
| KRT131               | 100   | 1.096E-16   |
| COL2A1               | 100   | 1.096E-16   |
| CKMT2                | 100   | 1.096E-16   |
| HLA-DRB5             | 100   | 1.096E-16   |
| SBSN                 | 100   | 1.096E-16   |
| FGG                  | 100   | 1.096E-16   |
| KRT134; LOC100653049 | 100   | 1.096E-16   |
| FAHD2B               | 100   | 1.096E-16   |
| FGB                  | 100   | 1.096E-16   |
| POLG                 | 100   | 1.096E-16   |
| COL11A2              | 100   | 1.096E-16   |
| MYOM2                | 100   | 1.096E-16   |
| HAPLN1               | 100   | 1.096E-16   |
| REFAP                | 100   | 1.096E-16   |

|                          |        |             |
|--------------------------|--------|-------------|
| ACAN                     | 5.555  | 1.34116E-09 |
| IKZF2                    | 5.934  | 2.40614E-15 |
| ENDOG                    | 6.001  | 2.30739E-11 |
| APOBEC3G                 | 6.101  | 1.39613E-10 |
| MRPL54                   | 6.2    | 1.33947E-06 |
| ORC1                     | 6.503  | 0.000230572 |
| TTI2                     | 6.648  | 0.000470145 |
| ALDH1A1                  | 6.749  | 2.97634E-05 |
| GOLGA7                   | 6.995  | 8.14345E-13 |
| DMTN; EPB49              | 7.302  | 3.24509E-13 |
| LMO2                     | 7.551  | 5.30013E-05 |
| VDR                      | 7.595  | 4.95049E-08 |
| LMF2                     | 7.845  | 6.14523E-09 |
| Clorf52                  | 7.867  | 3.44698E-05 |
| HMG4                     | 8.047  | 6.65237E-05 |
| FSD1L                    | 8.243  | 8.722E-07   |
| MYH13                    | 8.299  | 2.1551E-14  |
| SYVN1                    | 8.613  | 1.668E-13   |
| TAF9                     | 8.699  | 7.97311E-08 |
| YEATS2                   | 8.803  | 7.57555E-06 |
| CRTC3                    | 8.975  | 9.70089E-06 |
| RAB9A                    | 9.039  | 2.35059E-09 |
| XIAP                     | 9.166  | 1.41294E-10 |
| LARP4                    | 9.2    | 5.36362E-06 |
| UBE2B                    | 9.863  | 1.04521E-13 |
| FAM165B; SMIM11; SMIM11A | 9.883  | 6.12074E-08 |
| KRT4                     | 10.07  | 1.1083E-07  |
| RBMX2                    | 10.214 | 1.49249E-11 |
| BCKDK                    | 10.317 | 2.85438E-11 |
| COG7                     | 10.521 | 8.0831E-14  |
| SERPINE2                 | 10.538 | 4.52423E-14 |
| SATB1                    | 10.664 | 1.096E-16   |
| FOCAD                    | 10.85  | 2.40614E-15 |
| METTL2B                  | 10.856 | 7.52104E-11 |
| NAA16                    | 11.2   | 8.59754E-07 |
| ND1                      | 11.722 | 1.096E-16   |
| RAD51D                   | 11.81  | 4.76975E-07 |
| SPATA5                   | 12.122 | 3.74793E-12 |
| DPH1                     | 12.343 | 1.16934E-07 |
| KHNYN                    | 12.756 | 5.74857E-09 |
| KATNB1                   | 12.924 | 9.02383E-10 |
| KIF18B                   | 12.951 | 1.096E-16   |
| MYL1                     | 13.081 | 1.096E-16   |
| TNNC2                    | 13.358 | 1.096E-16   |
| AP4B1                    | 13.368 | 1.62456E-07 |
| COX20                    | 13.39  | 2.62296E-13 |
| MARK3                    | 13.786 | 2.90236E-08 |
| ZZEF1                    | 13.828 | 2.54682E-12 |
| PPP3CC                   | 14.145 | 4.88218E-09 |
| HLA-B                    | 14.185 | 1.096E-16   |
| TRMU                     | 14.446 | 1.23111E-10 |
| TGS1                     | 14.569 | 1.096E-16   |
| EYA3                     | 14.678 | 7.70387E-09 |
| RMND5A                   | 14.72  | 8.61091E-12 |
| MTIF3                    | 14.953 | 1.096E-16   |
| C22orf32; SMDT1          | 15.037 | 1.10501E-09 |
| SRL                      | 15.209 | 1.096E-16   |
| PYGL                     | 15.358 | 1.096E-16   |
| CAMK1D                   | 15.61  | 1.096E-16   |
| FGD2                     | 15.811 | 1.096E-16   |
| TAF5L                    | 16.247 | 9.29272E-11 |
| HABP2                    | 16.974 | 1.096E-16   |
| MPO                      | 16.991 | 1.096E-16   |
| PMF1; PMF1-BGLAP         | 17.163 | 2.40614E-15 |
| OIP5                     | 17.274 | 1.096E-16   |
| KIF16B                   | 17.4   | 3.81811E-09 |
| NOL7                     | 17.414 | 1.096E-16   |
| ACAD10                   | 17.762 | 6.93522E-10 |
| CKM                      | 17.947 | 1.096E-16   |
| UBAC2                    | 19.669 | 1.096E-16   |
| LRSAM1                   | 20.858 | 1.25402E-13 |
| MYLPF                    | 21.493 | 1.096E-16   |
| PRELP                    | 21.923 | 8.18349E-13 |
| CCDC134                  | 22.395 | 1.096E-16   |
| MYH2                     | 23.532 | 1.096E-16   |
| COG4                     | 26.557 | 1.096E-16   |
| TNN3                     | 33.919 | 1.096E-16   |
| CPA3                     | 38.621 | 1.096E-16   |
| ACADL                    | 54.69  | 1.096E-16   |
| SPARC                    | 60.208 | 1.096E-16   |
| MKI67                    | 100    | 1.096E-16   |
| MYH3                     | 100    | 1.096E-16   |
| MYH6                     | 100    | 1.096E-16   |
| SF1                      | 100    | 1.096E-16   |
| TPM1                     | 100    | 1.096E-16   |
| FLNC                     | 100    | 1.096E-16   |
| KRT17                    | 100    | 1.096E-16   |
| FBN1                     | 100    | 1.096E-16   |
| TPM1                     | 100    | 1.096E-16   |
| RAB11A                   | 100    | 1.096E-16   |
| CASQ1                    | 100    | 1.096E-16   |
| GEMIN2                   | 100    | 1.096E-16   |
| Csorf44; TRAPPC13        | 100    | 1.096E-16   |
| ASP                      | 100    | 1.096E-16   |
| FAM64A; PIMREG           | 100    | 1.096E-16   |
| Clorf27; ODR4            | 100    | 1.096E-16   |
| BRCA1                    | 100    | 1.096E-16   |
| YBEY                     | 100    | 1.096E-16   |
| COL9A2                   | 100    | 1.096E-16   |
| TMEM201                  | 100    | 1.096E-16   |
| YIF1B                    | 100    | 1.096E-16   |
| PLOD2                    | 100    | 1.096E-16   |
| ELL                      | 100    | 1.096E-16   |
| LTN1                     | 100    | 1.096E-16   |
| SIK3                     | 100    | 1.096E-16   |
| PTRF; CAVIN1             | 100    | 1.096E-16   |

|               |     |           |
|---------------|-----|-----------|
| TTC28         | 100 | 1.096E-16 |
| MCM3AP        | 100 | 1.096E-16 |
| MED12         | 100 | 1.096E-16 |
| DGKZ          | 100 | 1.096E-16 |
| PAPD5         | 100 | 1.096E-16 |
| RANBP6        | 100 | 1.096E-16 |
| URB1          | 100 | 1.096E-16 |
| PLK1          | 100 | 1.096E-16 |
| OXCT2         | 100 | 1.096E-16 |
| CDC42SE2      | 100 | 1.096E-16 |
| EARS2         | 100 | 1.096E-16 |
| MYOZ1         | 100 | 1.096E-16 |
| BNIP1         | 100 | 1.096E-16 |
| FASTKD2       | 100 | 1.096E-16 |
| MGP           | 100 | 1.096E-16 |
| WDSUB1        | 100 | 1.096E-16 |
| TNNI2         | 100 | 1.096E-16 |
| EPX           | 100 | 1.096E-16 |
| GMEB2         | 100 | 1.096E-16 |
| PRC1          | 100 | 1.096E-16 |
| WDR62         | 100 | 1.096E-16 |
| DNAJC3        | 100 | 1.096E-16 |
| PEX3          | 100 | 1.096E-16 |
| MRPL33        | 100 | 1.096E-16 |
| EIF4EBP2      | 100 | 1.096E-16 |
| GSDMA         | 100 | 1.096E-16 |
| LGALS3        | 100 | 1.096E-16 |
| GLIPR2        | 100 | 1.096E-16 |
| BRAT1         | 100 | 1.096E-16 |
| ANKS1A        | 100 | 1.096E-16 |
| ALG1          | 100 | 1.096E-16 |
| ACP5          | 100 | 1.096E-16 |
| TFEB          | 100 | 1.096E-16 |
| SMG6          | 100 | 1.096E-16 |
| BLOC1S2       | 100 | 1.096E-16 |
| TTC5          | 100 | 1.096E-16 |
| RARS2         | 100 | 1.096E-16 |
| RETSAT        | 100 | 1.096E-16 |
| NDUFAF3       | 100 | 1.096E-16 |
| ICT1; MRPL58  | 100 | 1.096E-16 |
| SNX4          | 100 | 1.096E-16 |
| MLST8         | 100 | 1.096E-16 |
| MATK          | 100 | 1.096E-16 |
| CD180         | 100 | 1.096E-16 |
| FARBP2        | 100 | 1.096E-16 |
| MATN3         | 100 | 1.096E-16 |
| RINT1         | 100 | 1.096E-16 |
| MICAL3        | 100 | 1.096E-16 |
| ALPL          | 100 | 1.096E-16 |
| NUF2          | 100 | 1.096E-16 |
| CCNH          | 100 | 1.096E-16 |
| LDB3          | 100 | 1.096E-16 |
| HLA-DQA2      | 100 | 1.096E-16 |
| MADD          | 100 | 1.096E-16 |
| UNC13D        | 100 | 1.096E-16 |
| COL1A2        | 100 | 1.096E-16 |
| MGA           | 100 | 1.096E-16 |
| HTT           | 100 | 1.096E-16 |
| PLOD3         | 100 | 1.096E-16 |
| RPTOR         | 100 | 1.096E-16 |
| KCMF1         | 100 | 1.096E-16 |
| ALDH3B1       | 100 | 1.096E-16 |
| STK19         | 100 | 1.096E-16 |
| NTSC3; NTSC3A | 100 | 1.096E-16 |
| GNAI2         | 100 | 1.096E-16 |
| PIPRA         | 100 | 1.096E-16 |
| COL11A1       | 100 | 1.096E-16 |
| DMBT1         | 100 | 1.096E-16 |
| ZFAND1        | 100 | 1.096E-16 |
| RPAP2         | 100 | 1.096E-16 |
| CC2D1B        | 100 | 1.096E-16 |
| LECT1; CNMD   | 100 | 1.096E-16 |
| CD84          | 100 | 1.096E-16 |
| PI4K2A        | 100 | 1.096E-16 |
| MRPL52        | 100 | 1.096E-16 |
| RFK           | 100 | 1.096E-16 |
| GPA1TCH1      | 100 | 1.096E-16 |
| HLA-DMB       | 100 | 1.096E-16 |
| FIBP          | 100 | 1.096E-16 |
| INSR          | 100 | 1.096E-16 |
| RIMS3         | 100 | 1.096E-16 |
| PPP1R14A      | 100 | 1.096E-16 |
| EMILIN1       | 100 | 1.096E-16 |
| CAMLG         | 100 | 1.096E-16 |
| FARBP1        | 100 | 1.096E-16 |
| CPPED1        | 100 | 1.096E-16 |
| CAGE1         | 100 | 1.096E-16 |
| ARID4A        | 100 | 1.096E-16 |
| COL4A2        | 100 | 1.096E-16 |
| AGTPBP1       | 100 | 1.096E-16 |
| C10orf76      | 100 | 1.096E-16 |
| PSD4          | 100 | 1.096E-16 |
| ATP5SL; DMAC2 | 100 | 1.096E-16 |
| ORC6          | 100 | 1.096E-16 |
| RYR1          | 100 | 1.096E-16 |
| CCDC127       | 100 | 1.096E-16 |
| CYP1A2        | 100 | 1.096E-16 |
| MYL10         | 100 | 1.096E-16 |
| SLC34A1       | 100 | 1.096E-16 |
| HPS1          | 100 | 1.096E-16 |
| HIPK2         | 100 | 1.096E-16 |
| NLRC4         | 100 | 1.096E-16 |

|                    |     |           |
|--------------------|-----|-----------|
| SESTD1             | 100 | 1.096E-16 |
| ZNF593             | 100 | 1.096E-16 |
| MVD                | 100 | 1.096E-16 |
| ITGB3              | 100 | 1.096E-16 |
| BUB1B              | 100 | 1.096E-16 |
| OGFOD3             | 100 | 1.096E-16 |
| ATR                | 100 | 1.096E-16 |
| DCLK3              | 100 | 1.096E-16 |
| ARL11              | 100 | 1.096E-16 |
| PHF16; JADE3       | 100 | 1.096E-16 |
| FAM118A            | 100 | 1.096E-16 |
| NSMAF              | 100 | 1.096E-16 |
| SLC25A35           | 100 | 1.096E-16 |
| ZNF296             | 100 | 1.096E-16 |
| C16orf58           | 100 | 1.096E-16 |
| TMSB10             | 100 | 1.096E-16 |
| COL4A1             | 100 | 1.096E-16 |
| PTTG1IP            | 100 | 1.096E-16 |
| CDC45              | 100 | 1.096E-16 |
| SNAIL              | 100 | 1.096E-16 |
| AGMAT              | 100 | 1.096E-16 |
| ITGB3BP            | 100 | 1.096E-16 |
| TMEM55B; PIP4P1    | 100 | 1.096E-16 |
| DNAH11             | 100 | 1.096E-16 |
| TFB2M              | 100 | 1.096E-16 |
| HDAC4              | 100 | 1.096E-16 |
| DPP8               | 100 | 1.096E-16 |
| CA3                | 100 | 1.096E-16 |
| TBC1D2B            | 100 | 1.096E-16 |
| PIIPNC1            | 100 | 1.096E-16 |
| TRIM34             | 100 | 1.096E-16 |
| COL6A2             | 100 | 1.096E-16 |
| HRSP12; RIDA       | 100 | 1.096E-16 |
| TM9SF1             | 100 | 1.096E-16 |
| PGS1               | 100 | 1.096E-16 |
| CASQ2              | 100 | 1.096E-16 |
| ZYG11B             | 100 | 1.096E-16 |
| MEA1               | 100 | 1.096E-16 |
| AMPD1              | 100 | 1.096E-16 |
| ALAS1              | 100 | 1.096E-16 |
| PARP2              | 100 | 1.096E-16 |
| BMP1               | 100 | 1.096E-16 |
| LPCAT4             | 100 | 1.096E-16 |
| CASC5; KNL1        | 100 | 1.096E-16 |
| KANSL2             | 100 | 1.096E-16 |
| EFCAB5             | 100 | 1.096E-16 |
| VWA5A              | 100 | 1.096E-16 |
| HHATL              | 100 | 1.096E-16 |
| DDX60              | 100 | 1.096E-16 |
| NUBPL              | 100 | 1.096E-16 |
| KIF18A             | 100 | 1.096E-16 |
| DAD1               | 100 | 1.096E-16 |
| APOC1              | 100 | 1.096E-16 |
| EDEM3              | 100 | 1.096E-16 |
| PIBF1              | 100 | 1.096E-16 |
| WDR4               | 100 | 1.096E-16 |
| FAM20B             | 100 | 1.096E-16 |
| GOLGA5             | 100 | 1.096E-16 |
| SNX20              | 100 | 1.096E-16 |
| SHKBP1             | 100 | 1.096E-16 |
| CTHRC1             | 100 | 1.096E-16 |
| SERPIND1           | 100 | 1.096E-16 |
| FKBP10             | 100 | 1.096E-16 |
| SYNM               | 100 | 1.096E-16 |
| C1orf101; CATSPERE | 100 | 1.096E-16 |
| CHM                | 100 | 1.096E-16 |
| ASNS               | 100 | 1.096E-16 |
| CASP9              | 100 | 1.096E-16 |
| HDHD3              | 100 | 1.096E-16 |
| NAA20              | 100 | 1.096E-16 |
| CBX4               | 100 | 1.096E-16 |
| C17orf62           | 100 | 1.096E-16 |
| HACL1              | 100 | 1.096E-16 |
| URM1               | 100 | 1.096E-16 |
| NFATC2             | 100 | 1.096E-16 |
| PPAPDC1A; PLPP4    | 100 | 1.096E-16 |
| CASC4              | 100 | 1.096E-16 |
| PAPD4              | 100 | 1.096E-16 |
| SKA2               | 100 | 1.096E-16 |
| HECTD1             | 100 | 1.096E-16 |
| DISP1              | 100 | 1.096E-16 |
| CP                 | 100 | 1.096E-16 |
| KBTBD10; KLHL41    | 100 | 1.096E-16 |
| OMD                | 100 | 1.096E-16 |
| ABC9               | 100 | 1.096E-16 |

Table S3. Differentially abundant proteins as quantified by label-free liquid chromatography mass spectrometry in KMT2A-r B-ALL xenografts. Protein Gene Symbol is displayed with BM / CNS quantification provided and p value corrected for multiple hypothesis testing in Proteome Discoverer.
